# Supplementary material
Source: publisher figshare collection journal article supplement (https://acs.figshare.com/ndownloader/files/3849310)
Supplement: Supplementary file 1 [file 3849310]

## **Supporting Information**

### **All-solid-state Reduced Graphene Oxide Supercapacitor with Large Volumetric Capacitance and Ultra-long Stability Prepared by Electrophoretic Deposition Method**

Mei Wang<sup>1</sup>, Le Dai Duong<sup>1</sup>, Nguyen Thi Mai<sup>1</sup>, Sanghoon Kim<sup>1</sup>, Youngjun Kim<sup>2</sup>, Heewon Seo<sup>2</sup>, Ye Chan Kim<sup>1</sup>, Woojin Jang<sup>2</sup>, Youngkwan Lee<sup>3</sup>, Jonghwan Suhr<sup>1,2</sup>, and Jae-Do Nam<sup>1,2\*</sup>

<sup>1</sup>Department of Energy Science, Sungkyunkwan University, Suwon, 440-746 (S. Korea)

<sup>2</sup>Department of Polymer Science and Engineering, Sungkyunkwan University, Suwon, 440-746 (S. Korea)

<sup>3</sup>Department of Chemical Engineering, Sungkyunkwan University, Suwon, 440-746 (S. Korea)

\*Corresponding author:

Jae-Do Nam

Email: [jdnam@skku.edu](mailto:jdnam@skku.edu)

Tel.: +82-31-290-7285

Fax: +82-31-292-8790

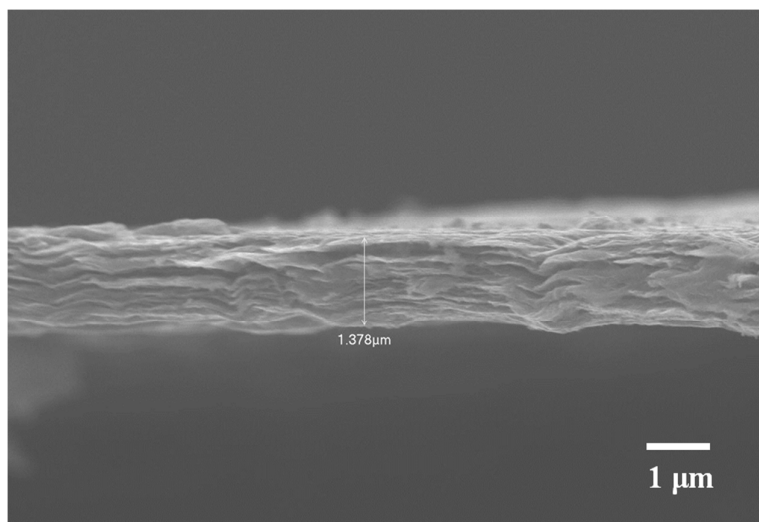

**Figure S1.** SEM image of cross-sectional RGO membrane, showing the layer-by-layer morphology with thickness of 1.378 μm.

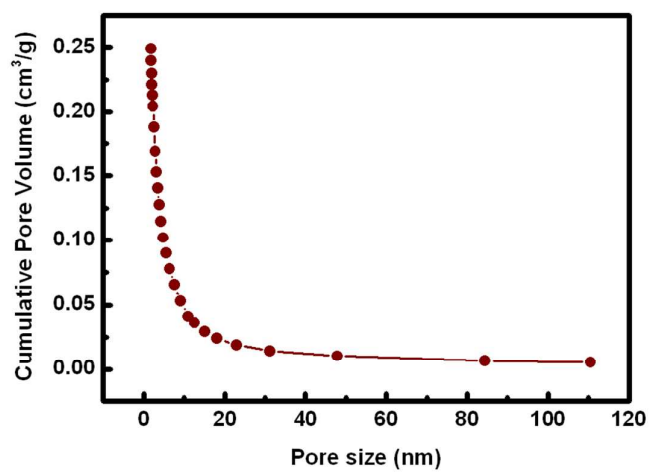

**Figure S2.** Cumulative pore volume as a function of pore width measured using nitrogen adsorption isotherm of RGO.

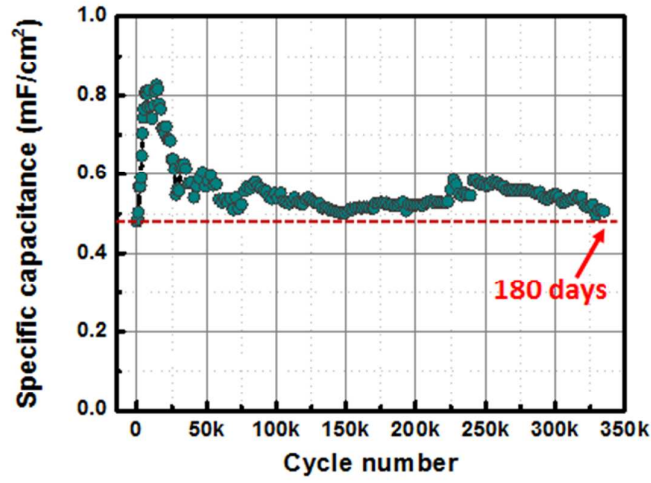

**Figure S3.** Cycle ability test of RGO all-solid-state supercapacitor measured by galvanostatic charge/discharge at the current of 0.2 mA, in terms of specific areal capacitance as a function of cycle number.

From the EIS measurement, the frequency responses of capacitances ( $C_A$  and  $C_{Vol}$ ) are estimated using the following equation:

$$C_A = \frac{1}{2\pi f A Z''(f)}, \quad C_{Vol} = \frac{1}{2\pi f V_{ol} Z''(f)} \quad (3)$$

where  $f$  is the frequency and  $Z''(f)$  is imaginary part of the impedance. The  $C_A$  and  $C_{Vol}$  are plotted as a function of frequency, as presented in Figure 4c.

The specific volumetric capacitance of the RGO supercapacitor can be described by using  $C'(f)$  and  $C''(f)$ , which are expressed as functions of frequency<sup>2</sup>:

$$C'(f) = \frac{Z''(f)}{2\pi f A |Z(f)|^2}, \quad C''(f) = \frac{Z'(f)}{2\pi f A |Z(f)|^2} \quad (4)$$

where  $C'(f)$  and  $C''(f)$  are the real and imaginary parts of specific capacitance,  $Z'(f)$  is the real part of the impedance, and  $|Z(f)|$  is the absolute value of the impedance<sup>1</sup>.

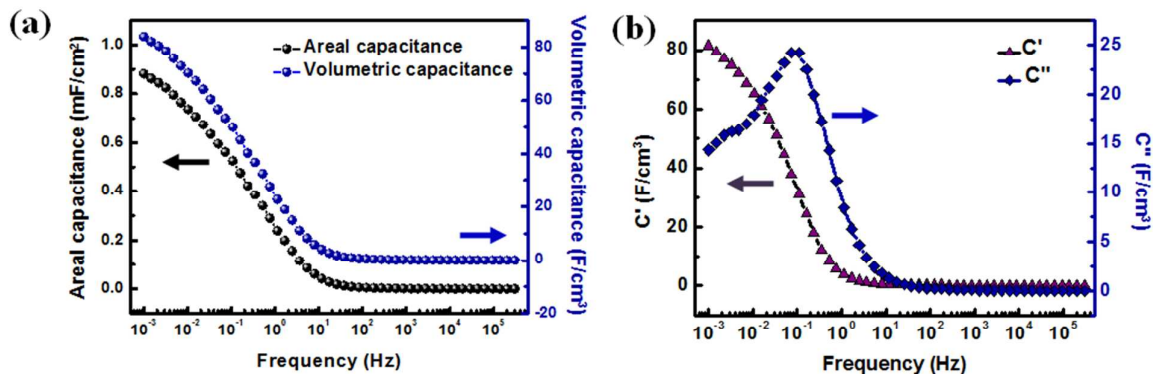

**Figure S4.** (a), Areal and volumetric capacitances as functions of frequency. (b), Plots of the real and imaginary parts ( $C'$  and  $C''$ ) of specific volumetric capacitance versus frequency.

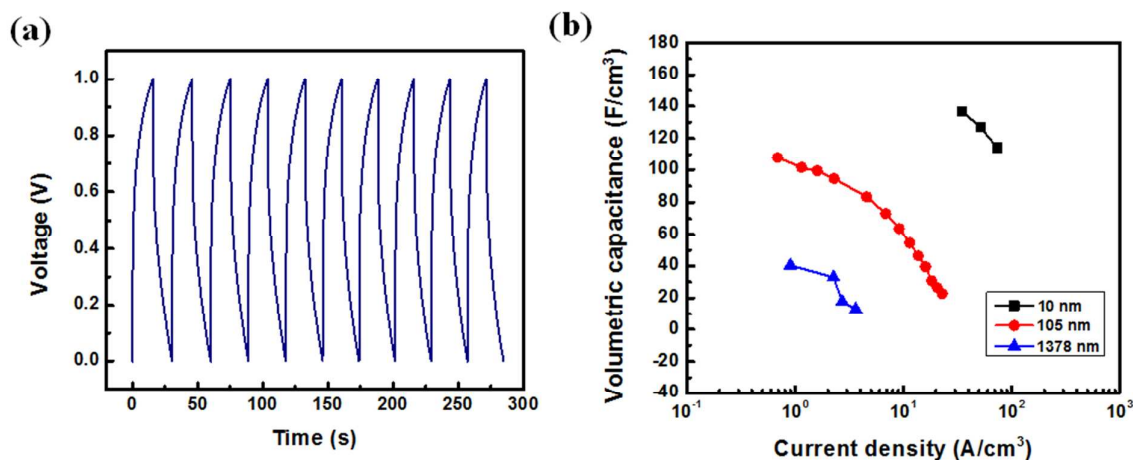

**Figure S5.** (a), Galvanostatic CD measurement of all-solid-state supercapacitor with RGO electrode thickness of 1.378  $\mu\text{m}$  at 0.5 mA. (b), Volumetric capacitance of RGO all-solid-state supercapacitor as a function of current density. The thicknesses of the supercapacitor RGO electrodes are 10, 105, 1378 nm, respectively.

## Reference

1. Lin, J.; Zhang, C.; Yan, Z.; Zhu, Y.; Peng, Z.; Hauge, R. H.; Natelson, D.; Tour, J. M. 3-Dimensional Graphene Carbon Nanotube Carpet-Based Microsupercapacitors with High Electrochemical Performance. *Nano Lett.* **2013**, 13, 72-78.
